1 **Early emergence phase of SARS-CoV-2 Delta variant in Florida**

2 Eleonora Cella<sup>1</sup>, Sobur Ali<sup>1</sup>, Sarah E. Schmedes<sup>2</sup>, Brittany Rife<sup>3,4</sup>, Simone Marini<sup>5</sup>, Marco  
3 Salemi<sup>3,4</sup>, Jason Blanton<sup>2</sup>, Taj Azarian<sup>1\*</sup>

4  
5 <sup>1</sup>Burnett School of Biomedical Sciences, University of Central Florida, Orlando, FL

6 <sup>2</sup>Bureau of Public Health Laboratories, Florida Department of Health, Jacksonville, FL

7 <sup>3</sup>Emerging Pathogens Institute, University of Florida, Gainesville, FL

8 <sup>4</sup>Department of Pathology, Immunology, and Laboratory Medicine, University of Florida,  
9 Gainesville, FL

10 <sup>5</sup>Department of Epidemiology, University of Florida, Gainesville, FL

11

12 **\* Correspondence and requests for materials should be addressed to:** [taj.azarian@ucf.edu](mailto:taj.azarian@ucf.edu)

13

14

15

16

17

18

19

20

21

22

23

24

25

26

27

28

29

30

31

32 **Abstract**

33 SARS-CoV-2, the causative agent of COVID-19, emerged in late 2020. The highly contagious  
34 B.1.617.2 (Delta) Variant of Concern (VOC) was first identified in October 2020 in India and  
35 subsequently disseminated worldwide, later becoming the dominant lineage in the U.S. Despite  
36 considerable genomic analysis of SARS-CoV-2 in the U.S., several gaps in the understanding of  
37 the local dynamics during early introductions remain, which when elucidated could translate the  
38 results of viral genomic epidemiology to actionable mitigation efforts. Here, we explore the early  
39 emergence of the Delta variant in Florida, U.S. using phylogenetic analysis of representative  
40 Florida and globally sampled genomes. We find multiple independent introductions into Florida  
41 primarily from North America and Europe, with a minority originating from Asia. These  
42 introductions lead to three distinct clades that demonstrated varying relative rates of transmission  
43 and possessed five distinct substitutions that were 3-21 times more prevalent in the Florida sample  
44 as compared to the global sample. Our results underscore the benefits of routine viral genomic  
45 surveillance to monitor epidemic spread and support the need for more comprehensive genomic  
46 epidemiology studies of emerging variants. In addition, we provide a model of epidemic spread of  
47 newly emerging VOCs that can inform future public health responses.

48 **Keywords:** SARS-CoV-2; Delta; early emergence; Florida; Phylogenetic analysis.

49

50

51

52

53

54

55

## 56 **Introduction**

57 Severe Acute Respiratory Syndrome Coronavirus 2 (SARS-CoV-2), the causative agent of  
58 COVID-19 disease, emerged in Wuhan city, China at the end of 2019 [1]. The virus subsequently  
59 spread globally, resulting in over 260 million infections and five million deaths. This global  
60 account included more than 45 million cases in the United States (U.S.) as of November 30<sup>th</sup>, 2021.  
61 Several SARS-CoV-2 variants have since emerged globally through continuous viral genome  
62 evolution [2]. The emergence of novel SARS-CoV-2 variants of concern (VOC) with increased  
63 infectivity, transmissibility, and/or virulence potential as compared to their progenitor lineage  
64 poses serious public health concerns. In particular, it is difficult to predict how VOCs will affect  
65 pandemic dynamics in the context of varying population immunity. Most concerning are VOCs  
66 that evade vaccine-induced immunity due to immune pressure[3].

67 Emergence of VOCs in the U.S. began in the fall of 2020 [4,5]. The SARS-CoV-2 Delta  
68 variant (B.1.617.2) was first identified in India in October, 2020 and became the dominant variant  
69 with a ferocious wave of infection in April-May of 2021. After April, 2021, the variant had spread  
70 in and among 65 countries across six continents globally [6] and was designated as a VOC by the  
71 U.S. Centers for Disease Control and Prevention (CDC)[7] and World Health Organization  
72 (WHO)[8] on May, 2021. In the United Kingdom (UK), the variant spread rapidly due to travel  
73 importation followed by community transmission and became the dominant variant responsible  
74 for 90% of the cases by June, 2021, overtaking the previously predominant Alpha variant (B.1.1.7)  
75 [9] [10]. In the U.S., the Delta variant was first detected by mid-March, 2021, and rapidly led to a  
76 new wave of infection in many locations. A nationwide study in the U.S. reported a drop of Alpha  
77 variant cases from 70% in late April to 42% in mid-June, with the B.1.617.2 variant leading much  
78 of the shift [11]. Beginning in the summer of 2021, Delta became the predominant lineage in North  
79 America, as well as in South Africa, India, UK and Canada [10,12–15].

80 Compared to its predecessor Alpha, the Delta variant possesses 12 notable mutations in the  
81 genomic region encoding the spike protein that provide a fitness advantage. In particular, the  
82 D614G substitution, which is shared with other VOCs including Alpha, Beta, Gamma and the  
83 more recently emerging Omicron, has been associated with increased transmissibility, infectivity,  
84 and severity relative to the original circulating strains [13,16–20], and experimental studies  
85 showed reduced neutralization of B.1.617.2 by vaccine/convalescent sera [21,22]. Multiple  
86 observational studies also reported on the reduced efficacy of the COVID-19 vaccines [19,23,24],

87 higher replication efficiency with an average doubling time of 25 days [25], and increased attack  
88 rate among younger, unvaccinated age groups [26]. The prevalence of Delta variants in  
89 unvaccinated individuals was three times that in fully vaccinated individuals in the UK, and social  
90 mixing had the potential to increase in infections, even with high levels of vaccination [26]. A  
91 recent study in South Korea indicated that pre-symptomatic transmission, superspreading  
92 potential, and the higher transmissibility of the Delta variant likely contributed to the secondary  
93 infection rate [27].

94 Florida is the 3<sup>rd</sup> most populous state in the U.S., a popular tourist destination, and a conduit  
95 to the rest of the country through its 26 major airports and eight major ports. Historically, Florida  
96 has been the epicenter of notable public health events and responses such as the emergence of Zika  
97 Virus in 2016 [28]. As such, the dynamics of introduction, spread, and exportation are important  
98 for the region. These dynamics are of particular importance since the emergence and subsequent  
99 spread of Delta varied considerably across geographic locations based on host demographic  
100 structure, circulating variants, historical incidence, and vaccination rates[29–31]. At the time Delta  
101 was introduced to Florida, there were no enforced statewide travel restrictions or mask  
102 requirements, schools were conducted in-person, and vaccination was limited to individuals over  
103 40 years of age or in target risk groups. Here, we sought to investigate the early emergence of  
104 Delta in Florida during a period with high background circulation of another variant (Alpha) by  
105 analyzing SARS-CoV-2 viral genome sequence data from Florida in the context of global data.  
106 Our findings provide insight into the introduction dynamics of future SARS-CoV-2 variants.

107

## 108 **Materials and Methods**

### 109 *Dataset*

110 All available genomes assigned as Delta were downloaded, excluding the low coverage  
111 and incomplete records, from GISAID ([www.gisaid.org](http://www.gisaid.org)) as of July 13<sup>th</sup>, 2021. Subsampling was  
112 performed to reduce the dataset for feasible computational analysis. A subsampling strategy was  
113 chosen to minimize the unbalanced representation of location-specific data while maximizing the  
114 genetic diversity and temporal distribution of sampling times for each geographic location using  
115 the Temporal And diveRsity Distribution Sampler for Phylogenetics (TARDiS) [32]. Each  
116 country was considered a distinct geographic location, with Florida considered distinct from the

117 remainder of the United States. Subsampling 213 genomic sequences from each of these 18  
118 locations resulted in 5,500 total sequences.

119 Viral genome sequences were aligned using ViralMSA with default parameters [33] using  
120 Wuhan-1 (MN908947.3) as reference. Manual curation using Aliview was performed to specify  
121 start site and remove artifacts at the terminal regions [34]. Maximum likelihood (ML) tree  
122 reconstruction using IQTREE (version 1.6.10) was employed, using the best-fit model of  
123 nucleotide substitution according to the Bayesian Information Criterion (BIC) as indicated by the  
124 Model Finder function [35]. The statistical robustness of individual nodes was determined using  
125 1,000 bootstrap replicates. The final dataset comprised 5,500 complete or near-complete SARS-  
126 CoV-2 genome sequences.

127

### 128 *Phylogenetic Analysis*

129 We then sought to estimate the change in virus effective population size ( $N_e$ ) over time and  
130 dynamic aspects of population structure in the context of Florida transmission. The ML tree was  
131 first assessed for the presence of temporal signal by evaluating the linear relationship between  
132 genetic distance of each tip from the best-fitting root of the tree (rooted on the branch that  
133 minimizes the mean square of the residuals) with its respective sampling time using TempEst  
134 v1.5.3 [36]. Temporal signal was evidenced by a positive relationship, allowing for subsequent  
135 dating of internal nodes via molecular clock calibration of tree tips using the *treedater* package in  
136 R v3.6.0 [37,38]. A constant evolutionary rate of  $8.0 \times 10^{-4}$  nucleotide substitutions per site per  
137 year [12,39] was used to re-scale branch lengths (substitutions/site) of the ML tree in units of time  
138 within TimeTree [40]. To estimate an upper limit of the number of and source of viral introductions  
139 into Florida, we then fit a migration model in TreeTime for which geographical locations were  
140 assigned to external (known based on sampling location) and internal nodes (inferred) [40]. Using  
141 the resulting annotated tree topology, we quantified transitions between internal nodes assigned to  
142 Florida and the other geographic locations included in the dataset, which represented putative  
143 importations and exportations.

144 The population structure of Florida Delta genomes was assessed to determine dominant  
145 sub-lineages indicative of distinct epidemic foci. Focused Bayesian molecular clock analysis was  
146 then conducted on the resulting individual clades using BEAST 1.10.4 [41]. Simultaneous  
147 molecular clock calibration and coalescent  $N_e$  estimation was modeled using a strict molecular

148 clock (constant evolutionary rate), HKY model of nucleotide substitution [42], and exponential  
149 growth in population size [43]. We computed Markov chain Monte Carlo (MCMC) triplicate runs  
150 of 100 million states each, sampling every 10,000 steps for each data set. Tracer v.1.7.1 was used  
151 to evaluate effective sampling sizes for relevant parameters, using 200 as the minimum threshold  
152 for sufficient MCMC sampling [44]. Maximum clade credibility trees were summarized from the  
153 MCMC samples using TreeAnnotator after discarding 10% as burn-in.

154 Last, we assessed variation in relative transmission dynamics among individual clades as  
155 well as local Florida sub-trees within each clade in the context of mutational patterns. For each  
156 cluster, we calculated the *Oster* statistic, which is a function of the size in tips, the sum of the  
157 branch lengths, and the length of the longest branch within an individual subtree [45,46]. This  
158 method was recently developed to infer transmission rates using human immunodeficiency virus  
159 (HIV) sequencing data.

160

161

162

163

164

165

166

167 **Results**

168 By July 2021, 2.4 million COVID-19 cases were reported in Florida and an estimated 11.3  
169 million people had received at least one dose of the vaccine. A significant reduction in the number  
170 of infections in Florida was observed at the beginning of 2021, during a period that was dominated  
171 by the Alpha variant (B.1.1.7, Figure 1A). After a period of seemingly stable epidemic recession,  
172 with few new cases detected between February – June 2021, a new epidemic wave impacted the  
173 state, resulting in a significant increase in incidence. This wave coincides with the introduction of  
174 the Delta variant to the state, increasing from 28.7% to 54.3% of genomes submitted to GISAID  
175 (July 13<sup>th</sup>, 2021, Figure 1 A). Within 3 months of its introduction, the Delta variant had completely  
176 supplanted Alpha as the most prevalent variant, accounting for 7.5% of all Florida sequenced  
177 genomes. When the Delta wave began in March 2021, vaccination was limited to healthcare  
178 professionals, individuals >40 years of age, and persons at high risk for severe disease (e.g.,  
179 immune-compromised). As a result, only 28% of the Florida population had received one vaccine  
180 dose and ~10% were fully vaccinated (Figure 1B). On April 5, vaccine eligibility was extend to  
181 individuals >18 years of age [47] and the Food & Drug Administration approved the Pfizer  
182 COVID-19 vaccine for individuals 12 years of age or older on May 12<sup>th</sup> (Figure 1) [48].

183

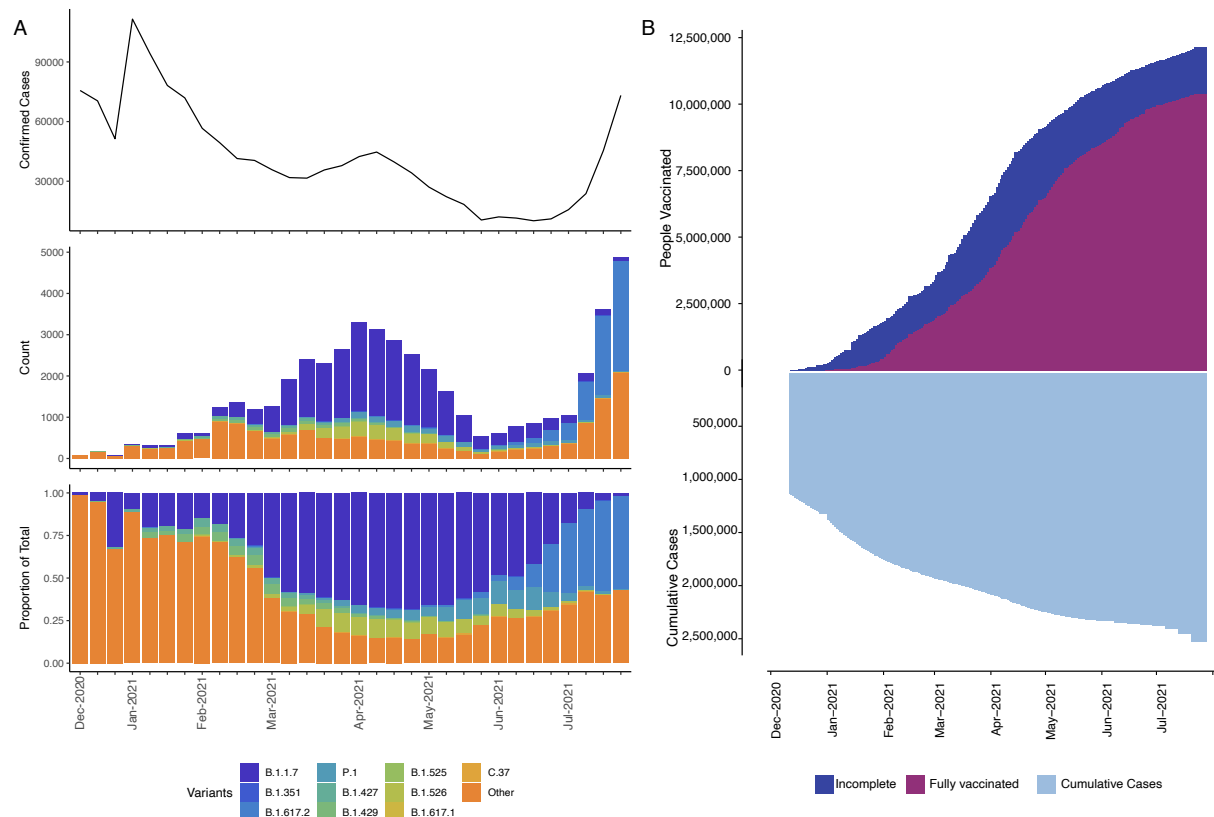

184

185 **Figure 1. Infection distribution over time in the context of SARS-CoV-2 lineages and vaccination.** A: Distribution (y-axes) of  
 186 previously considered variants of concern (VOC) over time (x-axis) in terms of number of weekly confirmed cases (top), count of  
 187 sequenced isolates stratified by VOC (middle), and the proportion of VOC (bottom). Remaining lineages are grouped into “Other”.  
 188 B: Vaccinated individuals (defined as *incomplete* for a single dose of Moderna or Pfizer and *fully* for two doses of Moderna or  
 189 Pfizer and a single dose of Johnson&Johnson, top) and cumulative number of weekly confirmed cases (bottom) over time (x-axis).

190

191 Analysis of 5,500 publicly available genomes (446 Florida genomes with a representative  
 192 subset of 5,054 genomes sampled globally) showed that Florida samples possessed characteristic  
 193 Delta substitutions in the region encoding the spike protein except for a E156G substitution, which  
 194 was not found among early Florida genomes (Figure 2). Five, less common substitutions emerged  
 195 among Delta variants from Florida, including K77T, A222V, V289I, and V1264L, which were 3-  
 196 21 times more prevalent in the Florida sample as compared to the global sample. In addition, T95I,  
 197 common also among Iota and Mu variants, was found to be at a lower prevalence than the global  
 198 sample (8.5% instead of 22.1%).

199



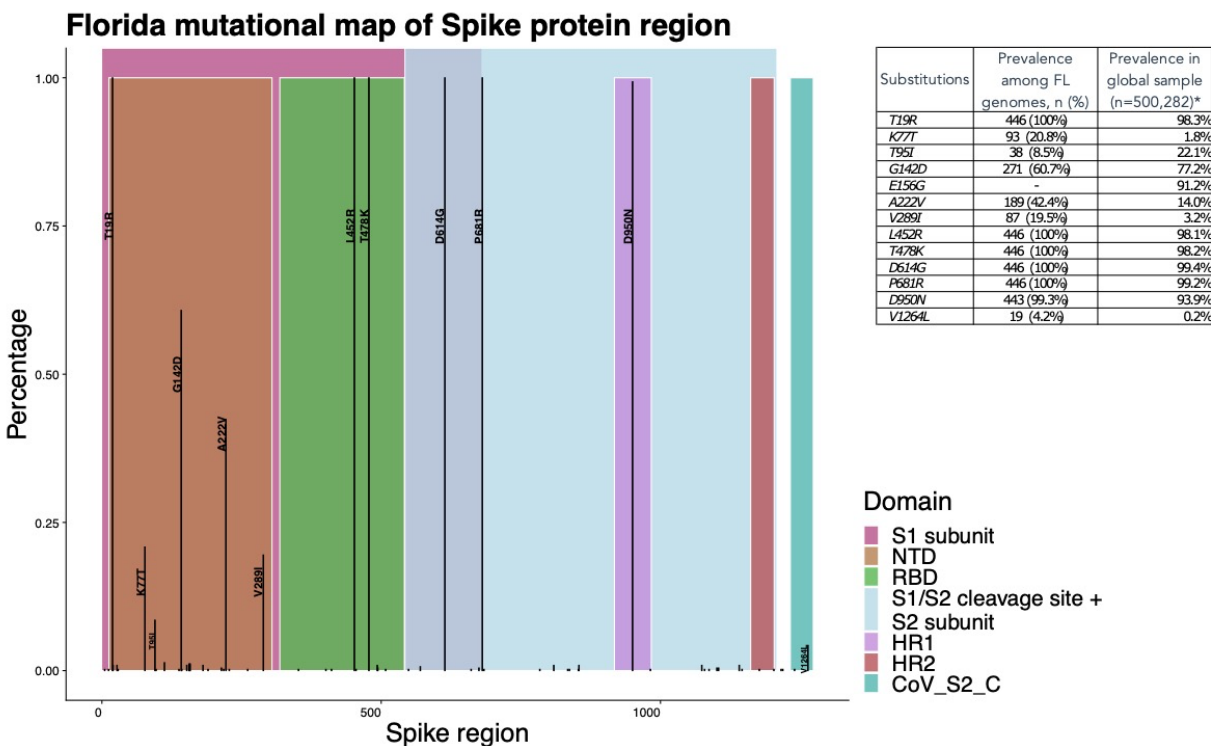

200  
 201 **Figure 2. Distribution of Spike protein substitutions among Florida SARS-CoV-2 Delta (B.1.617.2) variant genomes.** The x-  
 202 axis shows the coordinates of the region encoding the spike protein with its regions and the y-axis shows the proportion of genomes  
 203 carrying the substitution. The substitutions with a prevalence greater than 2% are annotated. The inlaid table includes the Delta  
 204 variant characterizing substitutions in spike protein region, the prevalence among Florida genomes, and the prevalence among  
 205 worldwide Delta genomes sampled from GISAID (\*) ([https://outbreak.info/compare-](https://outbreak.info/compare-lineages?pango=B.1.617.2&gene=S&threshold=0.2)  
 206 [lineages?pango=B.1.617.2&gene=S&threshold=0.2](https://outbreak.info/compare-lineages?pango=B.1.617.2&gene=S&threshold=0.2)).

207  
 208 Linear regression of root-to-tip genetic distances against sampling dates indicated that the  
 209 SARS-CoV-2 sequences evolve in a clock-like manner ( $r = 0.30$ ) (Supplementary Figure 1).

210

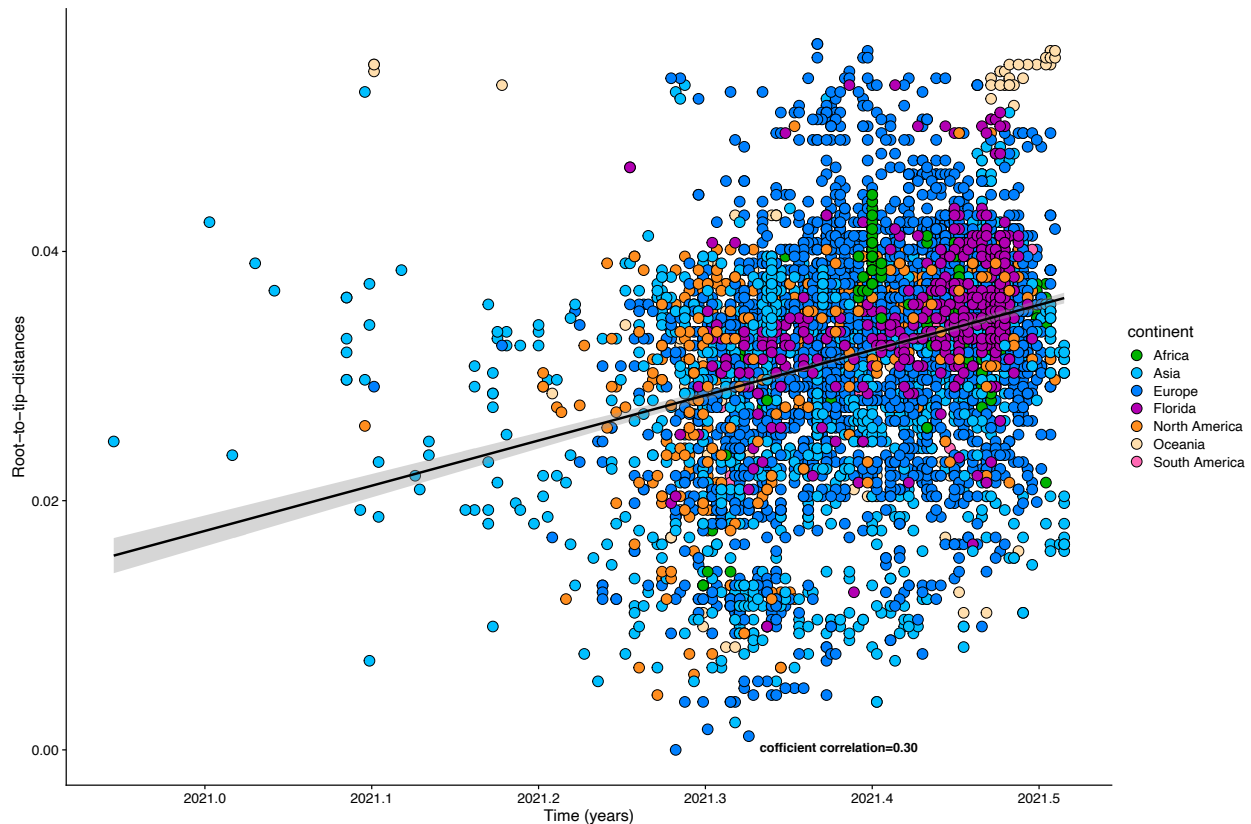

211

212 **Supplementary figure 1. Analysis of temporal structure.** Root-to-tip genetic divergence for the whole dataset against  
213 time of sampling.

214

215 Ancestral location reconstruction of the time-scaled tree elucidated the number and timing  
216 of viral migrations between Florida and the rest of the world (Figure 3). A total of 88 transitions  
217 from internal nodes assigned to allopatric locations to those assigned to Florida were observed in  
218 the phylogeny. Multiple inferred introductions to Florida occurred in late March to early April  
219 2021 from India, followed by onward migration to the U.S. starting in May (Figure 3A).  
220 Subsequent inferred introductions from other geographical locations were observed during the end  
221 of June 2021 as the Delta epidemic expanded. Overall, the greatest number of introduction events  
222 to Florida were observed to originate from the U.S., followed by Europe (lines marked in black,  
223 Figure 3B). Taxa from Florida were also intermediate in transitions between allopatric locations  
224 and the remaining U.S., accounting for nearly two-thirds of the number of migration events (double  
225 the number of inferred introductions into Florida, Figure 3B).

226

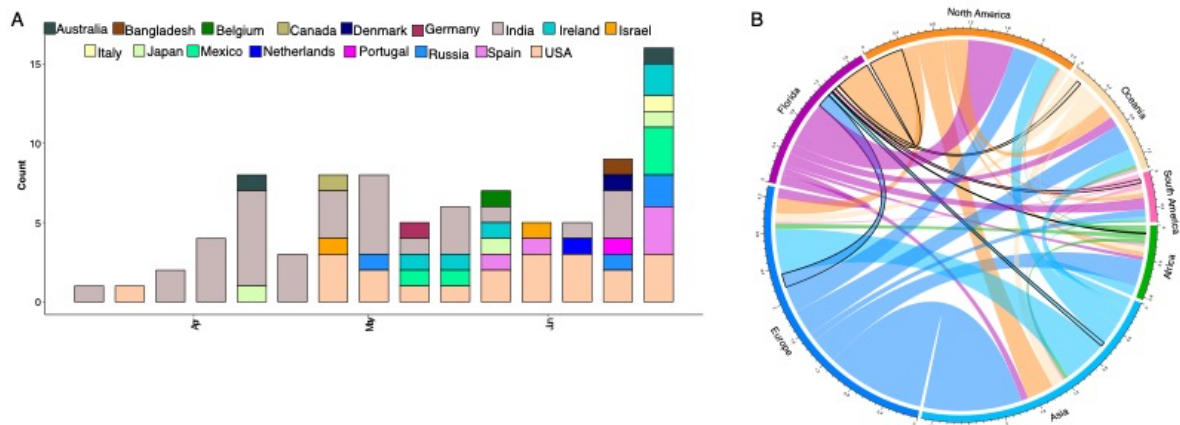

227  
228 **Figure 3. Sources of viral exchanges (imports and exports) in and outside Florida.** Movement was inferred using ancestral  
229 reconstruction of geographic states within the phylogenetic tree of genomic samples. **A.** Total number of viral introductions over  
230 time into Florida. **B.** Graphical representation of the estimated number of migration events between the geographic areas;  
231 introductions into the state of Florida are outlined in black.

232  
233

234 Independent concurrent migrations of Delta to Florida from North America, Europe, and  
235 Asia, occurring as early as April 2021, can be visualized on the ML time-tree (Figure 4). Based  
236 on internal support for divergence events within the tree (bootstrap values > 0.70), three distinct  
237 clades were identified: Subset I (n = 1026) comprised of 188 FL genomes; Subset II (n = 327)  
238 comprised 101 FL genomes, and Subset III (n = 470) comprised 83 FL genomes (Figure 4A, clade  
239 highlighted in grey and marked as I-III). These well-supported clades represent distinct foci of the  
240 local epidemic seeded by multiple introductions.

241 To assess these clades in more detail, we performed a separate Bayesian coalescent analysis  
242 (Figure 4B-D). The maximum clade credibility (MCC) trees showed four subtrees comprised  
243 predominately of Florida taxa, representing local spread (Figure 4B-D); all Florida subtrees  
244 presented with similar upper estimates of the timing of introduction - April 2021 (Figure 4B-D).  
245 However, the Florida clusters in panel C and D have very low statistical support due to the low  
246 genetic diversity of SARS-CoV-2 genomes sampled within a short time period [49–52]. When  
247 assessing clade-defining substitutions, we identified that spike A222V and V289I were isolated to  
248 Subset I genomes and K77T associated with Subset II. Further, a subclade of Subset I possessed  
249 both A222V and V289I, while another only carried A222V.

250 Comparison of transmission dynamics of each three clades and their respective subtrees  
251 found that Subset II exhibited the highest relative rate of transmission, followed by Subset III, then

252 Subset I; however, there was no clear association between the above-described mutations and  
253 relative transmission rates. Further, there was no significant difference in geographic composition  
254 of each clade when assessed in context of transmission rates (Figure 4). Florida subtrees exhibited  
255 a broader range of estimated transmission rates (0.62 vs. 0.14 units), which were generally higher  
256 than the background Subsets (Table 1), except for Florida Subtree C and its Subset II. Florida  
257 Subtree D showed evidence of the highest relative rate of transmission (2.13 units) as compared  
258 to its progenitor clade, Subtree III.

259

260 **Table 1.** Subset/subtree statistics (number of taxa, percentage of FL taxa, minor mutations  
261 associated and absolute Oster value).

| <i>Subset/ Subtree</i> | <i>N of taxa</i> | <i>% of FL taxa</i> | <i>Minor mutations associated</i> | <i>Oster value</i> |
|------------------------|------------------|---------------------|-----------------------------------|--------------------|
| Subset I               | 1026             | 18.3%               | A222V, V289I                      | 1.31               |
| <i>Subtree B1</i>      | 74               | 95.9%               | A222V                             | 1.59               |
| <i>Subtree B2</i>      | 88               | 100.0%              | A222V, V289I                      | 1.83               |
| Subset II              | 326              | 30.7%               | K77T                              | 1.52               |
| <i>Subtree C</i>       | 91               | 98.9%               | K77T                              | 1.51               |
| Subset III             | 470              | 17.7%               | -                                 | 1.45               |
| <i>Subtree D</i>       | 22               | 81.8%               | -                                 | 2.14               |

262

263

264

265

266

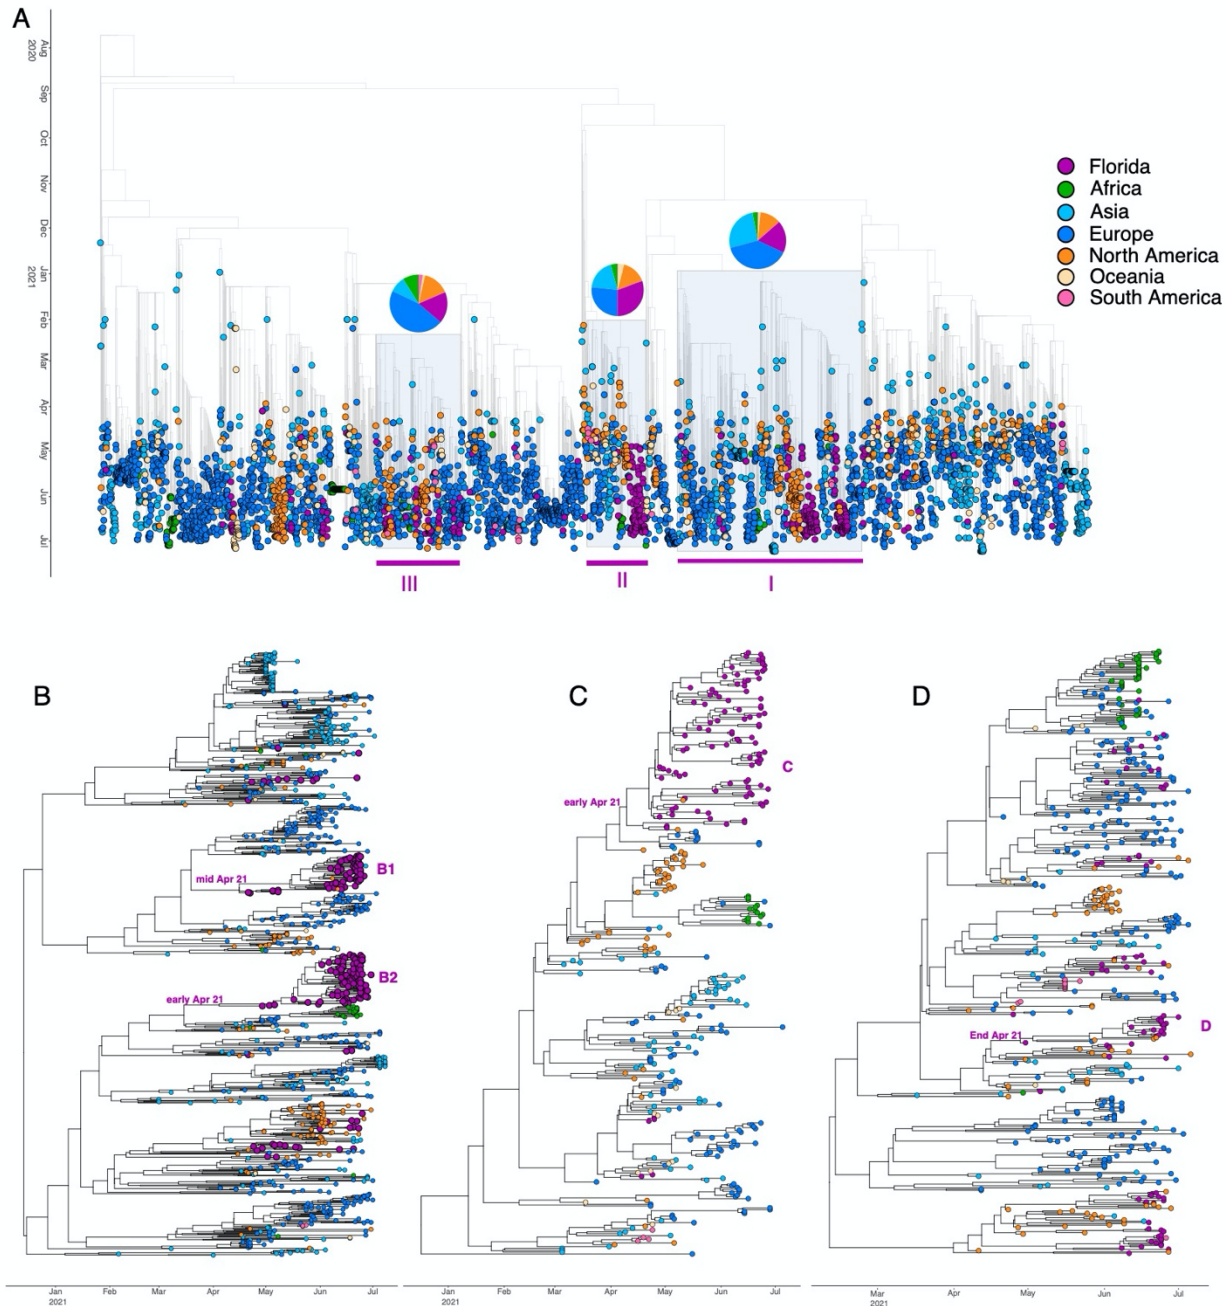

267

268 **Figure 4.** Time-resolved Maximum Likelihood trees containing high-quality Delta SARS-CoV-2 near-full-genome sequences. **A.**

269 Full time-resolved Maximum Likelihood tree for all sequence data. The three clades identified as being well-supported using

270 bootstrap (BS) analysis (BS>70) are highlighted in grey (referred to as clades I-III). A pie chart indicating the location distribution

271 is located on top of each of the three clades. **B-D.** MCC tree reconstruction for the three clades (I-III) individually. Tree tips are

272 colored according to their location (continent) and the color legend is on the top right of the figure.

273

## 274 **Discussion**

275 Genomic epidemiology has been integral in understanding SARS-CoV-2 emergence and  
276 spread and for tracking the evolutionary dynamics of viral transmission. In view of this, we  
277 investigated the introduction of the SARS-CoV-2 Delta variant in Florida, U.S. from the early  
278 identification and the main peak of infection that occurred in July 2021. By June 2021, the Delta  
279 variant had become the dominant lineage in the US, unseating the Alpha variant as the most  
280 prevalent lineage in Florida, U.S., and abroad [12,14]. Subsequently, Delta received considerable  
281 attention due to its rapid dispersal, high transmission rate, and association with vaccine failure  
282 through vaccine breakthrough cases [15].

283 These findings provide insight into the introduction and emergence of a novel SARS-CoV-  
284 2 variant (Delta) to a region with moderate population-level immunity and ongoing transmission  
285 of a resident variant (Alpha). The introduction of Delta variant to Florida was observed in early  
286 and late April 2021 primarily from India, which is consistent with the previously reported origins  
287 [12]. Multiple international introductions were observed at the end of June 2021 when about 45%  
288 of the state's eligible population was fully vaccinated, and about 53% had received at least one  
289 dose of vaccine in Florida [53].

290 Early Florida Delta isolates were interspersed among the isolates from other countries in  
291 the phylogeny, suggesting multiple introductions with most dating to early April 2021. These  
292 introductions coalesced into three distinct clades that dominated the early period of the Delta wave  
293 and resulted in the near complete replacement of the resident Alpha variant. A similar dynamic of  
294 multiple repeated introduction followed by rapid interstate transmission was observed in the U.S.  
295 after introduction of the Alpha variant [54,55]. While international and domestic travel was muted  
296 at the time Delta was introduced to Florida, there were no explicit restrictions. Likewise, as Delta  
297 completely displaced Alpha, Omicron could potentially displace Delta worldwide [56]; however,  
298 several scenarios could be considered, such as a long-term co-circulation or an Omicron wave  
299 followed by resurgence of Delta. The outcome of these scenarios may be affected by the  
300 combination of immune escape and intrinsic transmissibility. This will influence the endemic state  
301 of the virus, public health response, and changes to vaccination rates or other social practices. Last,  
302 as evidenced by our analysis of relative rates of transmission, there was considerable variation in  
303 transmission dynamics of dominant Florida Delta clades independent of mutational profile or

304 geographic composition of the progenitor lineages that seeded the local epidemic. This points to  
305 differences in host factors or public health measures that warrant further investigation.

306 As vaccine coverage rates remain low globally, the continued emergence of variants of  
307 concern remains likely, thus emphasizing the need for targeted viral genomic surveillance and  
308 expansion of novel surveillance tools. Two promising approaches are the use of wastewater  
309 surveillance at both the municipality level and targeted settings (e.g., airports) as well as the  
310 application of air collection monitors to detect SARS-CoV-2 in the environment (DH O'Connor,  
311 2022, In Preparation). When deployed, these tools can be used to assess the risk of infection in a  
312 setting, detect the emergence of novel variants, and track viral diversity and coupled with expanded  
313 viral genomic surveillance of COVID-19 cases create a robust network for situational awareness  
314 of the evolving pandemic.

315 Although the sequence data alone do not represent the true number of epidemiologically  
316 linked transmission chains, our phylogenetic findings clearly elucidate multiple introductions of a  
317 novel variant to a population with moderate levels of population immunity, a prevailing resident  
318 variant, and the absence of mandates. When interpreting our results, it's worth noting that  
319 importations and exportations were inferred from available sequence data available in GISAID.  
320 The availability of these data is influenced by several factors including SARS-CoV-2 testing and  
321 genomic surveillance capacity among countries. Further, whereas increased rates for Florida  
322 subtrees likely reflect local transmission dynamics, additional case-level data is required for more  
323 resolved investigation into the relative contribution of host and pathogen factors associated with  
324 differences. Nonetheless, our results further underscore the benefits of routine pathogen genomic  
325 surveillance to monitor outbreak investigations and support the need for more comprehensive  
326 epidemiological studies of newly emerging variants. They also provide a likely scenario for the  
327 trajectory of Omicron and subsequent variants whether emerging domestically or imported,  
328 reinforcing the necessity of continued genomic surveillance efforts globally.

329

330

331

332

333

334

335 **Author Contributions:** Conceptualization, MS and TA; Analysed the data: EC, BR, SM;  
336 Helped with study design and data interpretation: EC, SA, and TA; Writing – Original Draft  
337 Preparation, EC, SA, BR. Writing – Review & Editing, SES, MS, JB, TA. Supervision, MS, TA.

338  
339 **Funding:** This work was funded in part by a grant from The Rockefeller Foundation to the  
340 University of Florida and the University of Central Florida in order to accelerate regional genomic  
341 surveillance. The views and findings are those of the author and not those of the funder (The  
342 Rockefeller Foundation). This work was funded in part by Epidemiology and Laboratory Capacity  
343 award from the CDC Office of Advanced Molecular Detection to the Florida Department of Health  
344 Bureau of Public Health Laboratories.

345  
346 **Institutional Review Board Statement:** Not applicable

347 **Informed Consent Statement:** Not applicable.

348 **Data Availability Statement:** All input files along with all resulting output files and scripts used  
349 in the present study will be made available upon request.

350  
351 **Acknowledgments:** We thank the global laboratories that generated and made public the SARS-  
352 CoV-2 sequences (through GISAID) used as reference dataset in this study (Supplementary table  
353 1).

354 **Conflicts of Interest:** The authors declare no conflict of interest.

355



## 356 References

- 357 1. Wu, F.; Zhao, S.; Yu, B.; Chen, Y.-M.; Wang, W.; Song, Z.-G.; Hu, Y.; Tao, Z.-W.; Tian,  
358 J.-H.; Pei, Y.-Y.; et al. A new coronavirus associated with human respiratory disease in  
359 China. *Nature* **2020**, *579*, 265–269, doi:10.1038/s41586-020-2008-3.
- 360 2. Abdool Karim, S.S.; de Oliveira, T. New SARS-CoV-2 Variants — Clinical, Public  
361 Health, and Vaccine Implications. *N. Engl. J. Med.* **2021**, *384*, 1866–1868,  
362 doi:10.1056/nejmc2100362.
- 363 3. Thye, A.Y.K.; Law, J.W.F.; Pusparajah, P.; Letchumanan, V.; Chan, K.G.; Lee, L.H.  
364 Emerging sars-cov-2 variants of concern (Vocs): An impending global crisis.  
365 *Biomedicines* **2021**, *9*.
- 366 4. Hou, Y.J.; Chiba, S.; Halfmann, P.; Ehre, C.; Kuroda, M.; Dinnon, K.H.; Leist, S.R.;  
367 Schäfer, A.; Nakajima, N.; Takahashi, K.; et al. SARS-CoV-2 D614G variant exhibits  
368 efficient replication ex vivo and transmission in vivo. *Science (80-. )*. **2020**, *370*, 1464–  
369 1468, doi:10.1126/science.abe8499.
- 370 5. Yurkovetskiy, L.; Wang, X.; Pascal, K.E.; Tomkins-Tinch, C.; Nyalile, T.P.; Wang, Y.;  
371 Baum, A.; Diehl, W.E.; Dauphin, A.; Carbone, C.; et al. Structural and Functional  
372 Analysis of the D614G SARS-CoV-2 Spike Protein Variant. *Cell* **2020**, *183*, 739-751.e8,  
373 doi:10.1016/j.cell.2020.09.032.
- 374 6. Elbe, S.; Buckland-Merrett, G. Data, disease and diplomacy: GISAID’s innovative  
375 contribution to global health. *Glob. Challenges* **2017**, *1*, 33–46, doi:10.1002/gch2.1018.
- 376 7. CDC SARS-CoV-2 Variant Classifications and Definitions. *Cdc* **2021**, 1–12.
- 377 8. World Health Organization Tracking SARS-CoV-2 variants. *Who* **2021**,  
378 <https://www.who.int/en/activities/tracking-SARS-Co>.
- 379 9. Robishaw, J.D.; Alter, S.M.; Solano, J.J.; Shih, R.D.; DeMets, D.L.; Maki, D.G.;  
380 Hennekens, C.H. Genomic surveillance to combat COVID-19: challenges and  
381 opportunities. *The Lancet Microbe* **2021**, *2*, e481–e484, doi:10.1016/s2666-  
382 5247(21)00121-x.
- 383 10. Torjesen, I. Covid-19: Delta variant is now UK’s most dominant strain and spreading  
384 through schools. *BMJ* **2021**, *373*, n1445, doi:10.1136/bmj.n1445.
- 385 11. Bolze, A.; Cirulli, E.T.; Luo, S.; White, S.; Cassens, T.; Jacobs, S.; Nguyen, J.; Ramirez,  
386 J.M.; Sandoval, E.; Wang, X. Rapid displacement of SARS-CoV-2 variant B. 1.1. 7 by B.

- 387 1.617. 2 and P. 1 in the United States. *medRxiv* **2021**, 2021.06.20.21259195,  
388 doi:10.1101/2021.06.20.21259195.
- 389 12. Tegally, H.; Wilkinson, E.; Althaus, C.L.; Giovanetti, M.; San, J.E.; Giandhari, J.; Pillay,  
390 S.; Naidoo, Y.; Ramphal, U.; Msomi, N.; et al. Rapid replacement of the Beta variant by  
391 the Delta variant in South Africa. *medRxiv* **2021**, 2021.09.23.21264018,  
392 doi:10.1101/2021.09.23.21264018.
- 393 13. Sheikh, A.; McMenamin, J.; Taylor, B.; Robertson, C. SARS-CoV-2 Delta VOC in  
394 Scotland: demographics, risk of hospital admission, and vaccine effectiveness. *Lancet*  
395 **2021**, *397*, 2461–2462.
- 396 14. Bolze, A.; Luo, S.; White, S.; Cirulli, E.T.; Wyman, D.; Dei Rossi, A.; Machado, H.;  
397 Cassens, T.; Jacobs, S.; Schiabor Barrett, K.M.; et al. SARS-CoV-2 Variant Delta Rapidly  
398 Displaced Variant Alpha in the United States and Led to Higher Viral Loads. *SSRN*  
399 *Electron. J.* **2021**, 2021.06.20.21259195, doi:10.2139/ssrn.3952083.
- 400 15. U.S. CDC Delta Variant: What We Know About the Science | CDC Available online:  
401 <https://www.cdc.gov/coronavirus/2019-ncov/variants/delta-variant.html> (accessed on Nov  
402 5, 2021).
- 403 16. Korber, B.; Fischer, W.M.; Gnanakaran, S.; Yoon, H.; Theiler, J.; Abfalterer, W.;  
404 Hengartner, N.; Giorgi, E.E.; Bhattacharya, T.; Foley, B.; et al. Tracking Changes in  
405 SARS-CoV-2 Spike: Evidence that D614G Increases Infectivity of the COVID-19 Virus.  
406 *Cell* **2020**, *182*, 812-827.e19, doi:10.1016/j.cell.2020.06.043.
- 407 17. Volz, E.; Hill, V.; McCrone, J.T.; Price, A.; Jorgensen, D.; O’Toole, Á.; Southgate, J.;  
408 Johnson, R.; Jackson, B.; Nascimento, F.F.; et al. Evaluating the effects of SARS-CoV-2  
409 Spike mutation D614G on transmissibility and pathogenicity. *medRxiv* **2020**, *184*, 64–75,  
410 doi:10.1101/2020.07.31.20166082.
- 411 18. Daniloski, Z.; Jordan, T.X.; Ilmain, J.K.; Guo, X.; Bhabha, G.; Tenoever, B.R.; Sanjana,  
412 N.E. The spike d614g mutation increases sars-cov-2 infection of multiple human cell  
413 types. *Elife* **2021**, *10*, 1–16, doi:10.7554/eLife.65365.
- 414 19. Deng, X.; Garcia-Knight, M.A.; Khalid, M.M.; Servellita, V.; Wang, C.; Morris, M.K.;  
415 Sotomayor-González, A.; Glasner, D.R.; Reyes, K.R.; Gliwa, A.S.; et al. Transmission,  
416 infectivity, and neutralization of a spike L452R SARS-CoV-2 variant. *Cell* **2021**, *184*,  
417 3426-3437.e8, doi:10.1016/j.cell.2021.04.025.

- 418 20. Hester Allen, MSc, Amoolya Vusirikala, MFPH, Joe Flannagan, MSc, K.A.; Twohig,  
419 MPH, Asad Zaidi, MSc, COG-UK Consortium, Natalie Groves, MSc, J.; Lopez-Bernal,  
420 FFPH, Ross Harris, PhD, Andre Charlett, PhD, Gavin Dabrera, F.; Meaghan Kall, M.  
421 Increased household transmission of COVID-19 cases associated with SARS-CoV-2  
422 Variant of Concern B.1.617.2: a national case-control study.
- 423 21. Liu, C.; Ginn, H.M.; Dejnirattisai, W.; Ren, J.; Stuart, D.I.; Screaton, G.R. Article  
424 Reduced neutralization of SARS-CoV-2 B . 1 . 617 by vaccine and convalescent serum  
425 Reduced neutralization of SARS-CoV-2 B . 1 . 617 by vaccine and convalescent serum.  
426 *Cell* **2021**, *184*, 1–17.
- 427 22. Planas, D.; Veyer, D.; Baidaliuk, A.; Staropoli, I.; Guivel-Benhassine, F.; Rajah, M.M.;  
428 Planchais, C.; Porrot, F.; Robillard, N.; Puech, J.; et al. Reduced sensitivity of infectious  
429 SARS-CoV-2 variant B.1.617.2 to monoclonal antibodies and sera from convalescent and  
430 vaccinated individuals. *bioRxiv* **2021**, 2021.05.26.445838.
- 431 23. Yadav, P.D.; Ph, D.; Sapkal, G.N.; Ph, D.; Ella, R.; Sahay, R.R.; Ph, D. Neutralization  
432 against B . 1 . 351 and B . 1 . 617 . 2 with sera of COVID-19 recovered cases and  
433 vaccinees of BBV152 Corresponding author \* : *bioRxiv* **2021**, 1–10.
- 434 24. Wall, E.C.; Wu, M.; Harvey, R.; Kelly, G.; Warchal, S.; Sawyer, C.; Daniels, R.; Adams,  
435 L.; Hobson, P.; Hatipoglu, E.; et al. AZD1222-induced neutralising antibody activity  
436 against SARS-CoV-2 Delta VOC. *Lancet* **2021**, *398*, 207–209.
- 437 25. Challen, R.; Dyson, L.; Overton, C.E.; Guzman-Rincon, L.M.; Hill, E.M.; Stage, H.B.;  
438 Brooks-Pollock, E.; Pellis, L.; Scarabel, F.; Pascall, D.J.; et al. Early epidemiological  
439 signatures of novel SARS-CoV-2 variants: establishment of B.1.617.2 in England.  
440 *medRxiv* **2021**, 2021.06.05.21258365, doi:10.1101/2021.06.05.21258365.
- 441 26. Elliott, P.; Haw, D.; Wang, H.; Eales, O.; Walters, C.E.; Ainslie, K.E.C.; Atchison, C.;  
442 Fronterre, C.; Diggle, P.J.; Page, A.J.; et al. Exponential growth, high prevalence of  
443 SARS-CoV-2, and vaccine effectiveness associated with the Delta variant. *Science* (80-. ).  
444 *0*, eabl9551, doi:10.1126/science.abl9551.
- 445 27. Hwang, H.; Lim, J.-S.; Song, S.-A.; Achangwa, C.; Sim, W.; Kim, G.; Ryu, S.  
446 Transmission Dynamics of the Delta Variant of SARS-CoV-2 Infections in South Korea.  
447 *J. Infect. Dis.* **2021**, doi:10.1093/infdis/jiab586.
- 448 28. Likos, A.; Griffin, I.; Bingham, A.M.; Stanek, D.; Fischer, M.; White, S.; Hamilton, J.;

- 449 Eisenstein, L.; Atrubin, D.; Mulay, P.; et al. Local Mosquito-Borne Transmission of Zika  
450 Virus — Miami-Dade and Broward Counties, Florida, June–August 2016. *MMWR. Morb.*  
451 *Mortal. Wkly. Rep.* **2016**, *65*, 1032–1038, doi:10.15585/mmwr.mm6538e1.
- 452 29. Singanayagam, A.; Hakki, S.; Dunning, J.; Madon, K.J.; Crone, M.A.; Koycheva, A.;  
453 Derqui-Fernandez, N.; Barnett, J.L.; Whitfield, M.G.; Varro, R.; et al. Community  
454 transmission and viral load kinetics of the SARS-CoV-2 delta (B.1.617.2) variant in  
455 vaccinated and unvaccinated individuals in the UK: a prospective, longitudinal, cohort  
456 study. *Lancet Infect. Dis.* **2021**, *0*, doi:10.1016/S1473-3099(21)00648-4.
- 457 30. Mahase, E. Delta variant: What is happening with transmission, hospital admissions, and  
458 restrictions? *BMJ* **2021**, *373*, n1513, doi:10.1136/bmj.n1513.
- 459 31. Del Rio, C.; Malani, P.N.; Omer, S.B. Confronting the Delta Variant of SARS-CoV-2,  
460 Summer 2021. *JAMA - J. Am. Med. Assoc.* 2021, *326*, 1001–1002.
- 461 32. Marini, S.; Mavian, C.; Riva, A.; Prosperi, M.; Salemi, M.; Rife Magalis, B. Optimizing  
462 viral genome subsampling by genetic diversity and temporal distribution (TARDiS) for  
463 phylogenetics. *Bioinformatics* **2022**, *38*, 856–860, doi:10.1093/bioinformatics/btab725.
- 464 33. Moshiri, N. ViralMSA: Massively scalable reference-guided multiple sequence alignment  
465 of viral genomes. *Bioinformatics* **2021**, *37*, 714–716, doi:10.1093/bioinformatics/btaa743.
- 466 34. Larsson, A. AliView: A fast and lightweight alignment viewer and editor for large  
467 datasets. *Bioinformatics* **2014**, *30*, 3276–3278, doi:10.1093/bioinformatics/btu531.
- 468 35. Nguyen, L.T.; Schmidt, H.A.; Von Haeseler, A.; Minh, B.Q. IQ-TREE: A fast and  
469 effective stochastic algorithm for estimating maximum-likelihood phylogenies. *Mol. Biol.*  
470 *Evol.* **2015**, *32*, 268–274, doi:10.1093/molbev/msu300.
- 471 36. Rambaut, A.; Lam, T.T.; Carvalho, L.M.; Pybus, O.G. Exploring the temporal structure of  
472 heterochronous sequences using TempEst (formerly Path-O-Gen). *Virus Evol.* **2016**, *2*,  
473 doi:10.1093/ve/vew007.
- 474 37. Volz, E.M.; Frost, S.D.W. Scalable relaxed clock phylogenetic dating. *Virus Evol.* **2017**,  
475 *3*, doi:10.1093/ve/vex025.
- 476 38. Team, R. core R: A language and environment for statistical computing Available online:  
477 <https://www.r-project.org/>.
- 478 39. Giovanetti, M.; Cella, E.; Benedetti, F.; Magalis, B.R.; Fonseca, V.; Fabris, S.; Campisi,  
479 G.; Ciccozzi, A.; Angeletti, S.; Borsetti, A.; et al. SARS-CoV-2 shifting transmission

- 480 dynamics and hidden reservoirs limited the efficacy of public health interventions in Italy.  
481 *Commun. Biol.* **2020**, doi:10.1101/2020.12.16.20248355.
- 482 40. Sagulenko, P.; Puller, V.; Neher, R.A. TreeTime: Maximum-likelihood phylodynamic  
483 analysis. *Virus Evol.* **2018**, *4*, doi:10.1093/ve/vex042.
- 484 41. Suchard, M.A.; Lemey, P.; Baele, G.; Ayres, D.L.; Drummond, A.J.; Rambaut, A.  
485 Bayesian phylogenetic and phylodynamic data integration using BEAST 1.10. *Virus Evol.*  
486 **2018**, *4*, doi:10.1093/ve/vey016.
- 487 42. Hasegawa, M.; Kishino, H.; Yano, T. aki Dating of the human-ape splitting by a  
488 molecular clock of mitochondrial DNA. *J. Mol. Evol.* **1985**, *22*, 160–174,  
489 doi:10.1007/BF02101694.
- 490 43. Griffiths, R.C.; Tavaré, S. Sampling theory for neutral alleles in a varying environment.  
491 *Philos. Trans. R. Soc. Lond. B. Biol. Sci.* **1994**, *344*, 403–410,  
492 doi:10.1098/rstb.1994.0079.
- 493 44. Rambaut, A.; Drummond, A.J.; Xie, D.; Baele, G.; Suchard, M.A. Posterior  
494 summarization in Bayesian phylogenetics using Tracer 1.7. *Syst. Biol.* **2018**, *67*, 901–904,  
495 doi:10.1093/sysbio/syy032.
- 496 45. Oster, A.M.; France, A.M.; Panneer, N.; Cheryl Bañez Ocfemia, M.; Campbell, E.;  
497 Dasgupta, S.; Switzer, W.M.; Wertheim, J.O.; Hernandez, A.L. Identifying clusters of  
498 recent and rapid HIV transmission through analysis of molecular surveillance data. In  
499 Proceedings of the Journal of Acquired Immune Deficiency Syndromes; Lippincott  
500 Williams and Wilkins, 2018; Vol. 79, pp. 543–550.
- 501 46. Rich, S.N.; Richards, V.L.; Mavian, C.N.; Switzer, W.M.; Magalis, B.R.; Poschman, K.;  
502 Geary, S.; Broadway, S.E.; Bennett, S.B.; Blanton, J.; et al. Employing molecular  
503 phylodynamic methods to identify and forecast HIV transmission clusters in public health  
504 settings: A qualitative study. *Viruses* **2020**, *12*, 921, doi:10.3390/v12090921.
- 505 47. N.a. Documenting Florida’s path to recovery from the coronavirus (COVID-19)  
506 pandemic, 2020-2021 Available online:  
507 [https://ballotpedia.org/Documenting\\_Florida%27s\\_path\\_to\\_recovery\\_from\\_the\\_coronavir](https://ballotpedia.org/Documenting_Florida%27s_path_to_recovery_from_the_coronavirus_(COVID-19)_pandemic,_2020-2021)  
508 [us\\_\(COVID-19\)\\_pandemic,\\_2020-2021](https://ballotpedia.org/Documenting_Florida%27s_path_to_recovery_from_the_coronavirus_(COVID-19)_pandemic,_2020-2021).
- 509 48. Response, F.C.-19 Latest Vaccine Updates - Florida Department of Health COVID-19  
510 Outbreak Available online: <https://floridahealthcovid19.gov/latest-vaccine-updates/>

- 511 (accessed on Jan 18, 2022).
- 512 49. Mavian, C.; Marini, S.; Prospero, M.; Salemi, M. A snapshot of SARS-CoV-2 genome  
513 availability up to 30th march, 2020 and its implications. *bioRxiv* **2020**,  
514 2020.04.01.020594, doi:10.1101/2020.04.01.020594.
- 515 50. Mavian, C.; Marini, S.; Manes, C.; Capua, I.; Prospero, M.; Salemi, M. Regaining  
516 perspective on SARS-CoV-2 molecular tracing and its implications. *medRxiv* **2020**,  
517 2020.03.16.20034470, doi:10.1101/2020.03.16.20034470.
- 518 51. Xavier, J.; Giovanetti, M.; Adelino, T.; Fonseca, V.; Barbosa da Costa, A.V.; Ribeiro,  
519 A.A.; Felicio, K.N.; Duarte, C.G.; Ferreira Silva, M.V.; Salgado, Á.; et al. The ongoing  
520 COVID-19 epidemic in Minas Gerais, Brazil: insights from epidemiological data and  
521 SARS-CoV-2 whole genome sequencing. *Emerg. Microbes Infect.* **2020**, *9*, 1824–1834,  
522 doi:10.1080/22221751.2020.1803146.
- 523 52. Rambaut, A. Phylodynamic Analysis | 176 genomes | 6 Mar 2020 - Novel 2019  
524 coronavirus / nCoV-2019 Genomic Epidemiology - Virological Available online:  
525 <https://virological.org/t/phylodynamic-analysis-176-genomes-6-mar-2020/356> (accessed  
526 on Dec 22, 2021).
- 527 53. Mathieu, E.; Ritchie, H.; Ortiz-Ospina, E.; Roser, M.; Hasell, J.; Appel, C.; Giattino, C.;  
528 Rodés-Guirao, L. A global database of COVID-19 vaccinations. *Nat. Hum. Behav.* **2021**,  
529 *5*, 947–953, doi:10.1038/s41562-021-01122-8.
- 530 54. Alpert, T.; Lasek-Nesselquist, E.; Brito, A.F.; Valesano, A.L.; ... Early introductions and  
531 community transmission of SARS-CoV-2 variant B. 1.1. 7 in the United States. *medRxiv*  
532 2021, *184*, 2595–2604.
- 533 55. Washington, N.L.; Gangavarapu, K.; Zeller, M.; Bolze, A.; Cirulli, E.T.; Schiabor Barrett,  
534 K.M.; Larsen, B.B.; Anderson, C.; White, S.; Cassens, T.; et al. Emergence and rapid  
535 transmission of SARS-CoV-2 B.1.1.7 in the United States. *Cell* **2021**, *184*, 2587-2594.e7.
- 536 56. Viana, R.; Moyo, S.; Amoako, D.G.; Tegally, H.; Scheepers, C.; Althaus, C.L.; Anyaneji,  
537 U.J.; Bester, P.A.; Boni, M.F.; Chand, M.; et al. Rapid epidemic expansion of the SARS-  
538 CoV-2 Omicron variant in southern Africa. *Nature* **2022**, doi:10.1038/d41586-021-03832-  
539 5.
- 540
